# Supplementary material for: The utilization of bio-ethanol for production of 1-butanol catalysed by Mg–Al mixed metal oxides enhanced by Cu or Co
Source: Springer Nature journal article supplement (doi:10.1007/s10098-023-02581-5), 2023-07-29
Supplement: MOESM1 [file 25865342]

Figure S 1 Ethanol conversion in time (Catalysts stability)





Figure S 2 Correlation of catalysts properties and molar ratio of Cu in Cu-Mg-Al mixed metal oxides





Figure S 3 Correlation of catalysts properties and molar ratio of Cu in Cu-Mg-Al mixed metal oxides
